# Supplementary material for: The Role of Turtles as Coral Reef Macroherbivores
Source: PubMed Central journal article supplement (PMC3386948; doi:10.1371/journal.pone.0039979), 2012-06-29
Supplement: pone.0039979.s004.pdf [file pone.0039979.s004.pdf]

**Table S4.** Summary of previous dietary studies of the green turtle, *Chelonia mydas*. Values represent percent volume of each dietary category. Where quantitative estimates were not available †† indicates the dominant component, and \* indicates presence as a minor component. Literature cited referenced in S6.

| Life stage      | Method          | Sample Size | Seagrass | Macroalgae  |            |            | Sponge | Other Invertebrate | Location                    | Source                         |
|-----------------|-----------------|-------------|----------|-------------|------------|------------|--------|--------------------|-----------------------------|--------------------------------|
|                 |                 |             |          | Chlorophyta | Rhodophyta | Phaeophyta |        |                    |                             |                                |
| Juvenile        | Lavage          | 113         | 59.7     | 9.3         | 26.3       |            |        |                    | Moreton Banks, Queensland   | Read & Limpus 2002             |
| Juvenile        | Lavage          | 127         | 25.5     | 14.3        | 62.7       | 1.8        |        |                    | Flathead Gutter, Queensland | Read & Limpus 2002             |
| Juvenile        | Lavage          | 20          | 45.7     |             | 47.3       |            |        | 6.8                | Moreton Bay, Queensland     | Brand-Gardner et al. 1999      |
| Juvenile        | Lavage          | 40          | 0.1      | 4           | 89.9       | 0.7        | 0.4    | 0.8                | Florida                     | Gilbert et al. 2008            |
| Juvenile        | Lavage          | 108         | 81.8     | 0.5         | 13.9       | 0.9        |        | 0.5                | Green Island, GBR           | Fuentes et al. 2006            |
| Subadult        | Lavage          | 15          |          | 49.4        | 49.9       |            | 0.6    |                    | Baja California, Mexico     | Lopez-Mendilaharsu et al. 2008 |
| Subadult        | Lavage          | 191         | 2.1      | 11.6        | 78         | 1.7        |        | 0.9                | Hawaii                      | Arthur & Balazs 2008           |
| Subadult /Adult | Lavage          | 146         | 85.5     | < 1.0       | 9.4        | < 1.0      | < 1.0  | 1.3                | Shoalwater Bay, Qld         | Arthur et al. 2009             |
| Subadult /Adult | Stomach content | 243         | 88.6     | 3.1         | 4.8        | 0.3        | 0.9    | 0.4                | Nicaragua                   | Mortimer 1981                  |
| Subadult /Adult | Lavage          | 408         |          | 30          | 38.6       | 29.5       |        |                    | Heron Island, GBR           | Forbes 1996                    |
| Subadult /Adult | Stomach content | 9           | > 50     | ca 15       |            | ca 10      |        |                    | Oman                        | Ross 1985                      |
| Subadult /Adult | Crop contents   | 372         | ca 4     | ca 20       | ca 65      | ca 7       |        |                    | Kane'ohe Bay, Hawaii        | Russell & Balazs 2009          |
| Subadult /Adult | Lavage & faecal | 101         |          | 4.4         | 90         |            |        | 2.9                | Gulf of California, Mexico  | Seminoff et al. 2002           |
| Subadult Adult  | Lavage          | 65          |          | 43.3        | 33.1       | 5.8        |        | 8.8                | Galapagos Islands           | Carrion-Cortez et al 2010      |
| Adult           | Stomach content | 1           |          | ††          |            | *          |        |                    | Tokelau                     | Balazs 1983                    |
