# Supplementary material for: The Role of Turtles as Coral Reef Macroherbivores
Source: PubMed Central journal article supplement (PMC3386948; doi:10.1371/journal.pone.0039979), 2012-06-29
Supplement: pone.0039979.s005.pdf [file pone.0039979.s005.pdf]

**Table S5.** Summary of previous dietary studies of the hawksbill turtle, *Eretmochelys imbricata*. Values represent percent volume of each dietary category. Where quantitative estimates were not available †† indicates the dominant component, and \* indicates presence as a minor component. Literature cited referenced in S6.

| Life stage      | Method             | Sample Size | Seagrass | Macroalgae  |            |            | Sponge | Other Invertebrate | Location            | Source                 |
|-----------------|--------------------|-------------|----------|-------------|------------|------------|--------|--------------------|---------------------|------------------------|
|                 |                    |             |          | Chlorophyta | Rhodophyta | Phaeophyta |        |                    |                     |                        |
| Juvenile        | Photograph         | NA          |          |             |            |            | ††     | *                  | Cayman Islands      | Blumenthal et al. 2009 |
| Subadult /Adult | Stomach content    | 64          |          |             |            |            | 95.3   |                    | Caribbean           | Meylan 1988            |
| Subadult /Adult | Lavage             | 75          |          |             |            |            | ††     | *                  | Puerto Rico         | van Dam & Diez 1997    |
| Subadult /Adult | Lavage             | 18          |          | 1.6         | 3.8        | 0.2        | 0.4    | 94                 | US Virgin Islands   | Mayor et al 1998       |
| Subadult /Adult | Lavage             | 146         |          | 1.2         | 2.1        | 0.7        | 91.6   | 4.8                | Cuba                | Alvarez 2000           |
| Adult           | Direct Observation | 1           |          |             |            |            |        | ††                 | Southeastern Brazil | Stampar et al. 2007    |
| Adult           | Direct Observation | 1           |          |             |            |            |        | ††                 | Aldabra Atoll       | Obura et al 2010       |
